# Supplementary material
Source: PubMed Central journal article supplement (PMC2986256)

Supplementary Figure 1

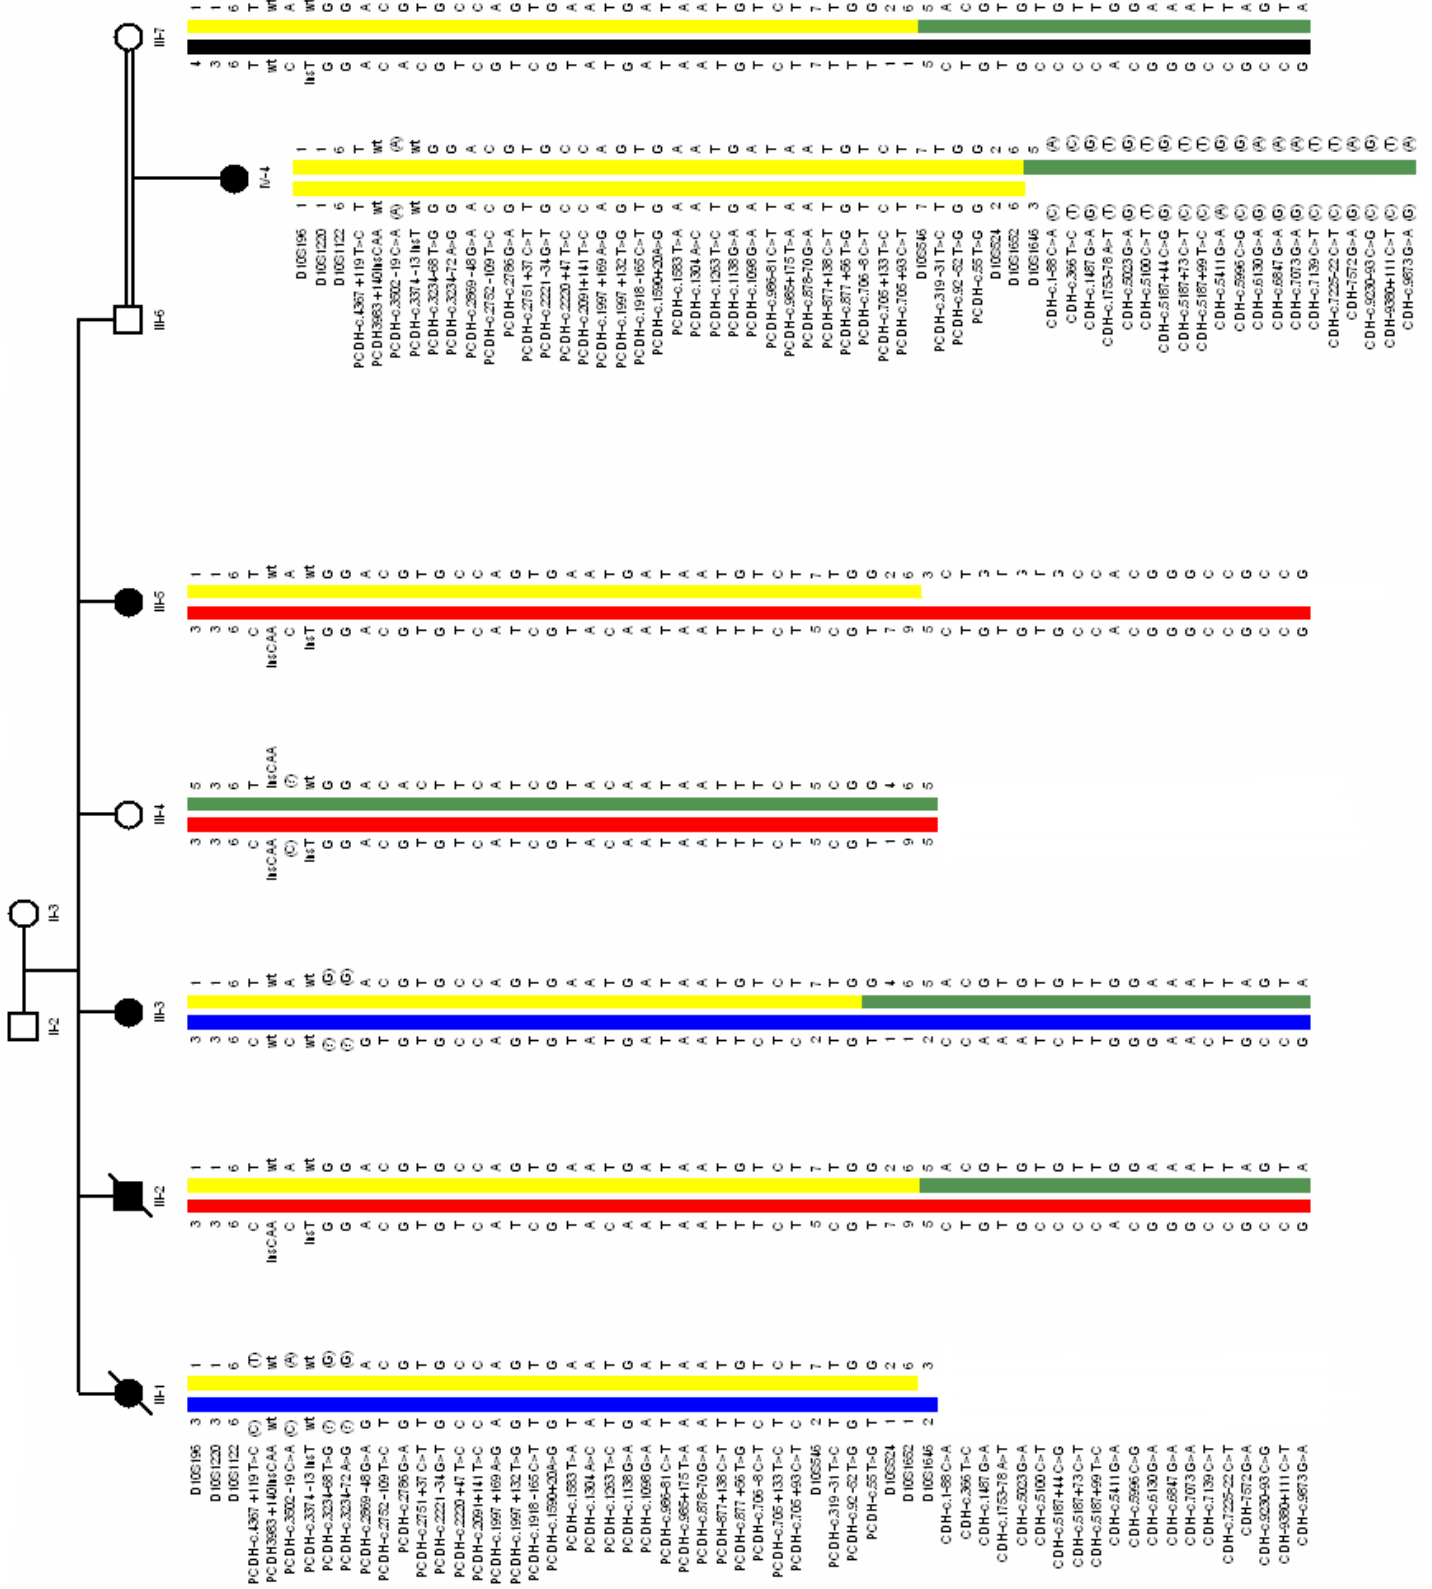

Supplement: ejhg2008231x1.pdf [file ejhg2008231x1.pdf]

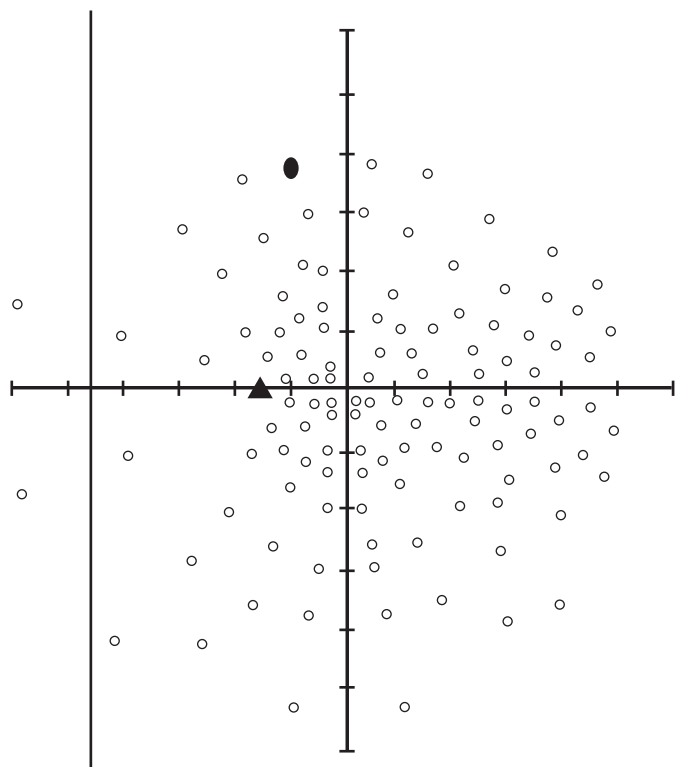

Left

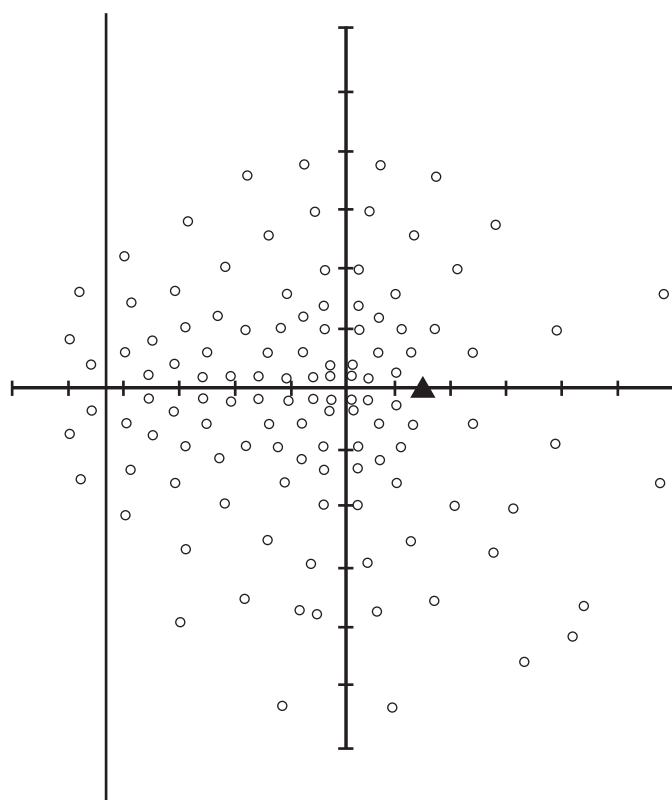

Right

Supplement: ejhg2008231x2.pdf [file ejhg2008231x2.pdf]
